# Supplementary material for: Improving light extraction of flexible OLEDs using a mechanically robust Ag mesh/ITO composite electrode and microlens array
Source: Royal Society of Chemistry journal article supplement (doi:10.1039/c8tc01415a), 2018-01-01
Supplement: c8tc01415a1.pdf [file c8tc01415a1.pdf]

## Supplementary information

### **Improving Light Extraction of Flexible OLEDs using a Mechanically Robust Ag Mesh/ITO Composite Electrode and Microlens Array**

*By So-Ra Shin<sup>a†</sup>, Hock Beng Lee<sup>a†</sup>, Won-Yong Jin<sup>a</sup>, Keum-Jin Ko<sup>a</sup>, Sunghee Park<sup>b</sup>, Seunghyup Yoo<sup>b</sup> and Jae-Wook Kang<sup>a</sup>*

[a] So-Ra Shin, Dr. Hock Beng Lee, Won-Yong Jin, Keum-Jin Ko and Prof. J.-W. Kang\*

Department of Flexible and Printable Electronics, Polymer Materials Fusion Research Center,  
Chonbuk National University, Jeonju 54896, Republic of Korea

\*E-mail: [jwkang@jbnu.ac.kr](mailto:jwkang@jbnu.ac.kr)

[b] Sunghee Park, Prof. Seunghyup Yoo

Department of Electrical Engineering, Korea Advanced Institute of Science and Technology  
(KAIST), Daejeon 34141, Republic of Korea.

\*E-mail: [syoo@ee.kaist.ac.kr](mailto:syoo@ee.kaist.ac.kr)

†S.-R. Shin and H.B. Lee made equal contribution to this paper.

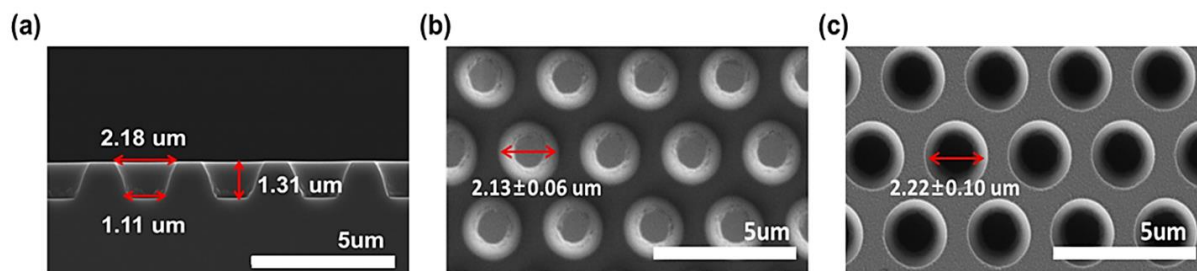

Figure S1. (a) Cross-section-view FE-SEM image of the MLA master mold at 10 kx magnification. Top-view FESEM images of (b) NOA74/PET template and (c) MLA replica mold (PDMS).

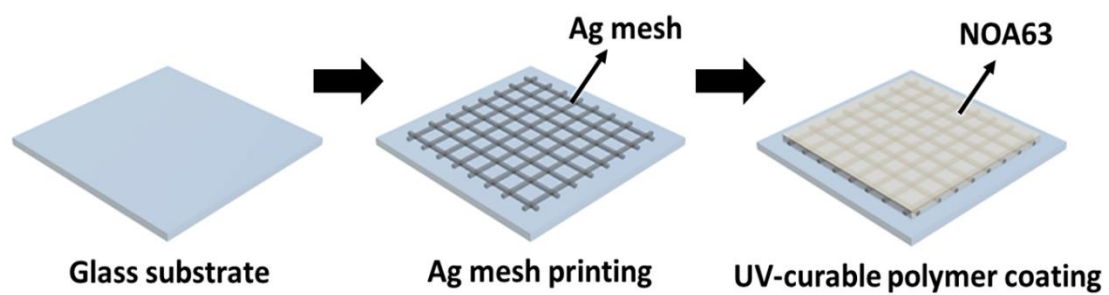

Figure S2. Schematic illustration of the Ag mesh fabrication and embedding process.

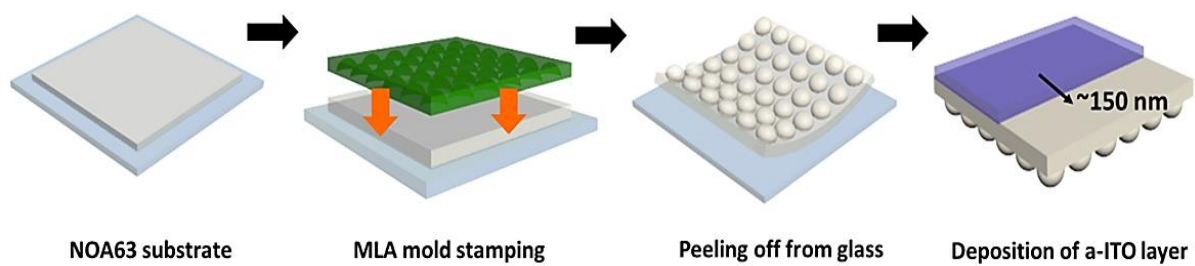

Figure S3. Stage-by-stage schematic illustration of the fabrication process for ITO electrodes with MLAs.

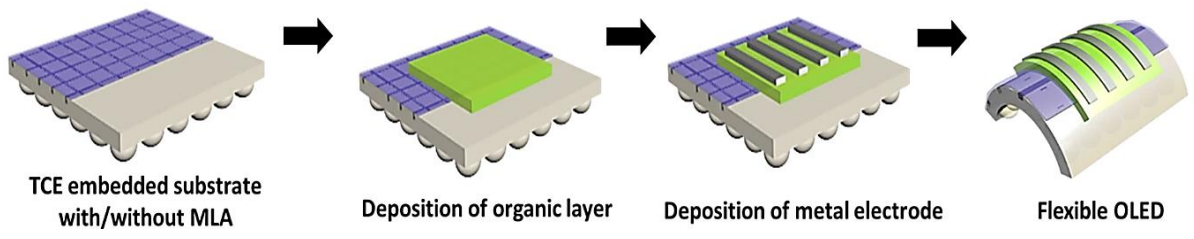

Figure S4. Schematic illustration of the OLED device fabrication process.

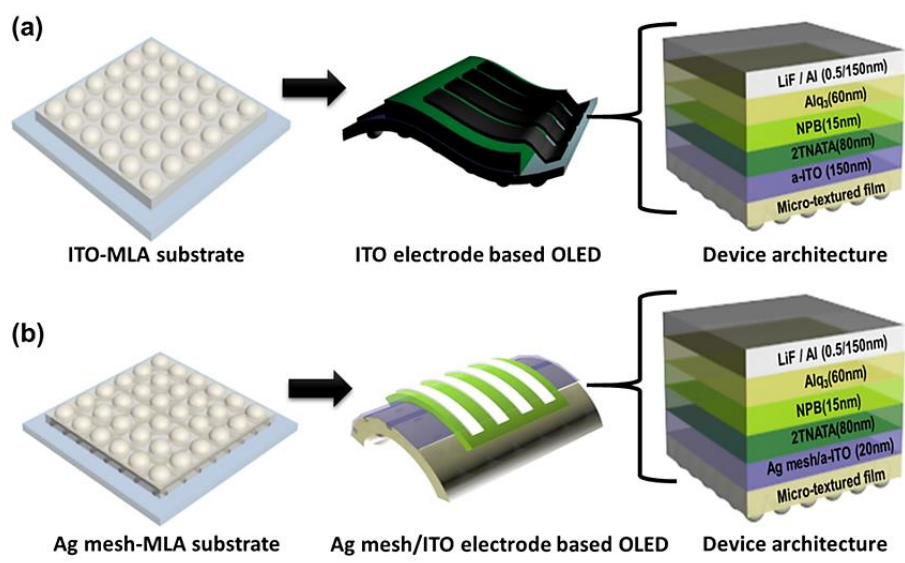

Figure S5. Schematic illustration of the device architecture of the as-fabricated (a) ITO-MLA- and (b) Ag mesh/ITO-MLA-based OLEDs.

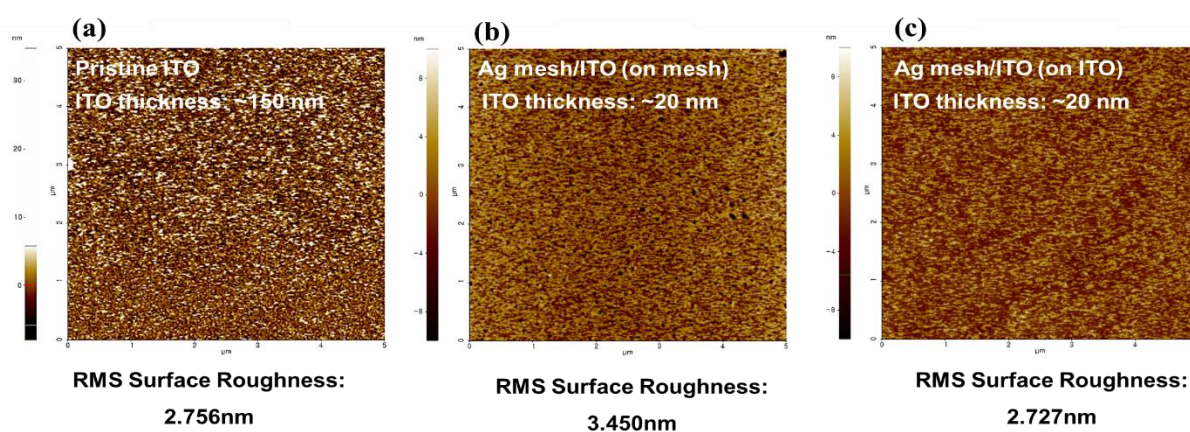

Figure S6. AFM topography micrograph of (a) pristine ITO electrode, (b) Ag mesh/ITO electrode (on mesh region) and (c) Ag mesh/ITO electrode (on ITO region).

## Total EQE ( $\eta_{EQE.total}$ ) measurement

The OLED devices with different substrates were aligned and attached to the entrance port of an integrating sphere (Labsphere Inc.), while a spectrometer (Ocean Optics, USB2000+UV-VIS) was connected to the outlet port of the integrating sphere to measure the luminous flux. It is noteworthy that the total luminous flux in the forward direction from the active emitting areas of the device opened toward the inside of an integrating sphere.

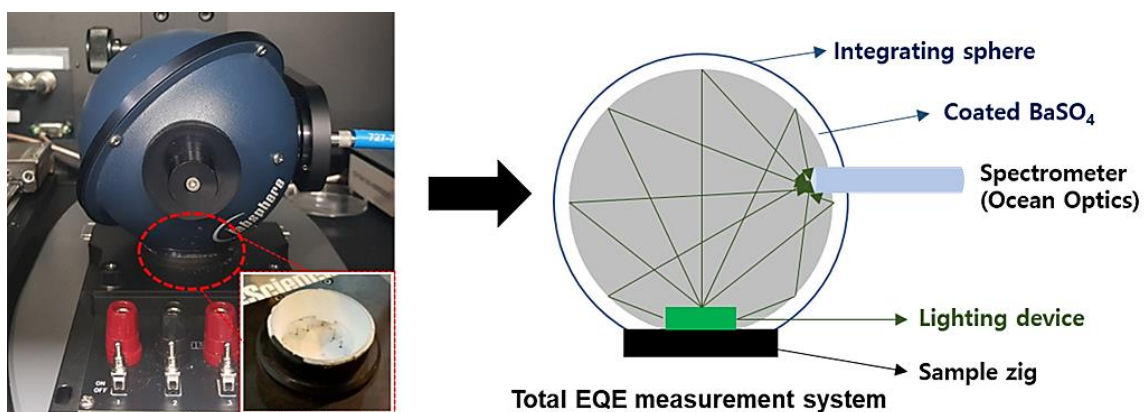

Figure S7. Actual image and schematic illustration of the  $\eta_{EQE.total}$  measurement setup with the integrating sphere.



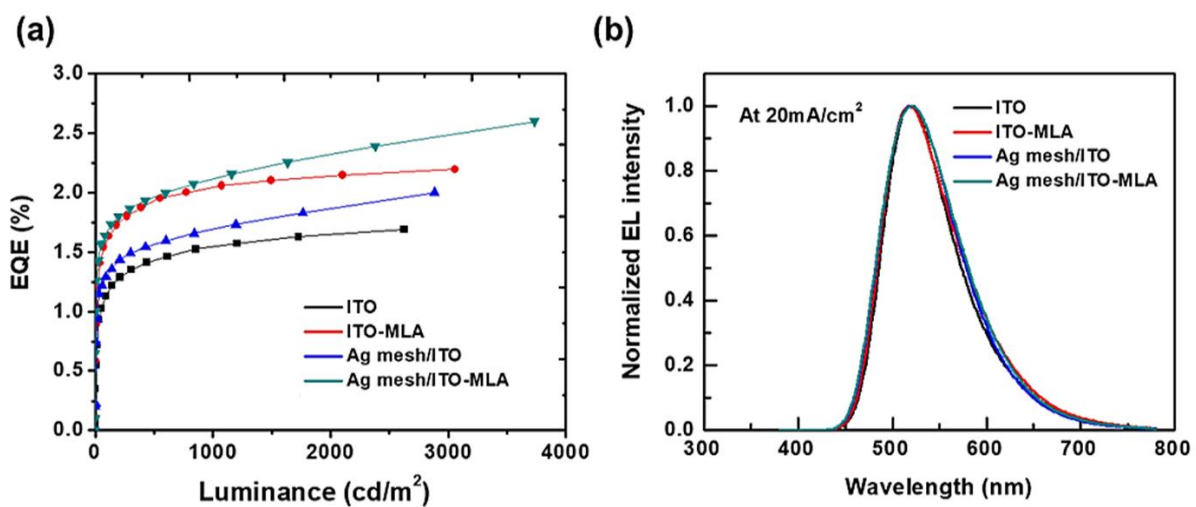

Figure S8. (a) EQE versus luminance and (b) normalized EL intensity versus wavelength for OLED devices employing different flexible substrates.

## Bending test

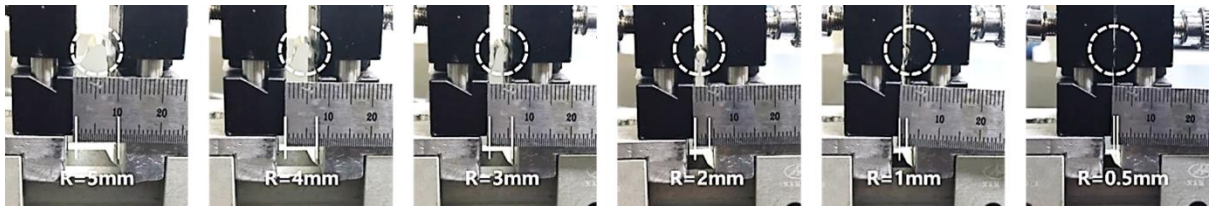

Figure S9. Photograph of the bending test setup at various values of bending radius,  $R$ .
